# Supplementary material
Source: bioRxiv or medRxiv preprint supplement (https://www.biorxiv.org/highwire/filestream/44344/field_highwire_adjunct_files/1/149229-2.pdf)
Supplement: Supplementary file [file 149229-2.pdf]

## **Supplemental text and tables**

### **Differing strategies used by motor neurons and glia to achieve robust development of an adult neuropil in *Drosophila***

Jonathan Enriquez<sup>1</sup>, Laura Quintana Rio<sup>2</sup>, Richard Blazeski<sup>3</sup>, Carol Mason<sup>3</sup>, and Richard S. Mann<sup>2</sup>

## Supplementary Figure legends

### Figure S1. Gal4 drivers label Dll+ thoracic astrocytes and EGs in the adult.

(A-C) Adult VNS expressing mCD8:GFP (green) (A1-A4) or nGFP (green) (B1-C4) under the control of *alm-Gal4* (A1-C4), *R56F03-Gal4* (B1-B4) or both (C1-C4) and immunostained with anti-Repo (blue) and anti-Dll (red). (B2) boxed region shows EG processes surrounding an astrocyte. Note that all of the glia surrounding adult neuropils express either *alm-Gal4* or *R56F03-Gal4*, and all NG express Dll.

(D-E) Adult VNS expressing H2B::RFP (red) under the control of *alm-Gal4* (D1-D4) or *R56F03-Gal4* (E1-E4) immunostained with anti-pros (blue). Note: As for other region of the CNS Prospero is expressed in astrocyte and not in EG.

Arrowhead: EG, Arrow: Astrocytes. ProNm: Prothoracic Neuromere, AMNn: Accessory Mesothoracic FS: Frontal Section, TS: Transverse Section.

### Figure S2. Developmental origin of the NG.

(A) L3 CNS in which glia surrounding the six immature leg neuropil express mCD8::GFP under the control of *R31F10-Gal4* and are costained with anti-BRP (blue), anti-Dll (red). A2 shows the thoracic region at higher magnification

(B) Adult VNS expressing mCD8:GFP (green) under the control of *R31F10-Gal4* costained with anti-BRP (blue).

(C) Adult VNS with neuropil glia expressing the multicolor flybow system FB1.1 (yellow, red and green) under the control of a lineage tracing method activated with *R31F10-Gal4* and immunostained with anti-Pros (blue) (see **Methods** for details).

ProNm: Prothoracic Neuromere, AMNn: Accessory Mesothoracic Neuromere, MesoNm: Mesothoracic Neuromere, MetaNm: Metathoracic Neuromere, FS: Frontal Section T1, T2, T3 : Three thoracic segments.

### Figure S3. Developmental origin of the NG.

(A) L3 CNSs with neuropil glia precursors expressing mCD8::GFP under the control of *Dll-Gal4* and labeled with anti-BRP (blue), anti-NCad (red).

### Figure S4. Expression and function of Dll during NG development

(A-D) L3 CNSs expressing mCD8::GFP under the control of *repo-Gal4* (A1-A4), *alrm-Gal4* (B1-B4), *R56F03-Gal4* (C1-C4) and *Dll-Gal4* (D1-D4). (A1-A4) Arrows indicate the different classes of NG: LSG: Larval surface glia (Dll-), LCG: Larval cortex glia (Dll+), LNG: Larval neuropil glia (Dll++), NGp: Neuropil Glia precursors (Dll+++). (B1-B4) Arrows indicate astrocytes. (C1-C4) Arrowheads indicate EG; arrows indicate astrocytes. (D1-D4) Asterisk indicates interneurons expressing Dll.

(E-F) Adult VNS expressing mCD8::GFP under the control of *Dll-Gal4* (E1-E3) or *repo-Gal4* (F1-F4) costained with anti-BRP (blue) and anti-Dll (red) (E1-E3) or anti-Repo (blue) and anti-Dll (red) (F1-F4). (E1-E3) Arrows indicate adult NG (GFP-), note Dll is expressed in the axonal sensory neuron and in one interneuron per neuromere. (F1-F4) Arrows indicated the different classes of NG: ASG: Adult Surface Glia (Dll-), ACG: Adult Cortex Glia (Dll+), ANG: Adult Neuropil Glia (Dll++).

(G-H) L3 T2 hemisegment containing a *WT* (G1-G4) and a *Dll*<sup>-/-</sup> (H1-H4) Lin A MARCM clones expressing mCD8::GFP under the control of *VGlut-gal4* and *repo-Gal4* and immunostained against anti-Dll (red) and anti-BRP (blue). (C2, D2) the arrows indicate a Lin A neuropil glia precursors (NGp).

(I-L) *WT* (I1-J3) and *Dll* (L1-L3) *cis*<sup>2</sup> MARCM Lin A clones expressing mCD8::GFP and mCD8::RFP under the control of *repo-Gal4* and *VGlut-QF*, respectively (I1-I2, K1-K2) or UAS-mCD8::GFP, QUAS-mCD8::GFP and UAS-H2B::RFP under the control of *repo-Gal4*, *VGlut-Gal4* and *VGlut-QF* (J1-J3, L1-L3) and co-stained with anti- BRP (blue).

ProNm: Prothoracic Neuromere, AMNn: Accessory Mesothoracic Neuromere, MesoNm: Mesothoracic Neuromere, MetaNm: Metathoracic Neuromere,. FS: Frontal Section T1, T2, T3: Three thoracic segments.

### **Figure S5. Number of astrocytes produced by each of the three NGB.**

(A) Average number of Lin A (N=10), Lin D (N=4), Lin Z (N=13) astrocytes in adult VNS.

(B-C) Number of astrocytes in individual Lin A, Lin D, Lin X samples. Error bars indicate standard deviation.

### **Figure S6. Lin A *cis*<sup>2</sup> MARCM in T2 and T3 segments.**

(A-D) *WT* Lin A *cis*<sup>2</sup> MARCM clones expressing mCherry (A1-B2) or mCD8:RFP (C1- D2) and mCD8::GFP (A1-D2) under the control of *alm-Gal4* (A1-B2), *R56F03-Gal4* (C1-D2) and *VGlut-QF* (A1-D2) respectively.

**Supplemental Table 1. Number of NG**

|                                            | Number of Ensheathing glia | Number of Astrocytes |
|--------------------------------------------|----------------------------|----------------------|
| L1 Larva: Brain hemispheres                | ~12                        | ~15                  |
| L1 Larva: Abdominal hemi-segments          | 3                          | 6                    |
| Adult: Brain hemispheres                   | ~1335                      | ~1550                |
| Adult: Prothoracic Neuromeres              | ~140                       | ~139                 |
| Adult: Accessory + Mesothoracic Neuromeres | ~210                       | ~200                 |
| Adult: Metathoracic Neuromeres             | ~160                       | ~160                 |

**Supplemental Table 2. *cis*<sup>2</sup>-MARCM experiments with astrocyte and EG drivers**

|                              | Number of clones |
|------------------------------|------------------|
| Lin A clones with astrocytes | >12              |
| Lin Z clones with astrocytes | 4                |
| Lin D clones with astrocytes | 15               |
| Lin A clones with EG         | >4               |
| Lin D clones with EG         | 0                |
| Lin Z clones with EG         | 9                |

**Supplemental Table 3. Number and final location of astrocytes born in T1.**

| LIN A born in T1 | ProNm astrocyte number | AMesoNm astrocyte number | MesoNm astrocyte number | total | ProNm targeting | AMesoNm targeting | MesoNm targeting | controlateral targeting |
|------------------|------------------------|--------------------------|-------------------------|-------|-----------------|-------------------|------------------|-------------------------|
| exp1             | 54                     | 3                        | 0                       | 57    | yes             | yes               | yes              | yes                     |
| exp2             | 80                     | 23                       | 1                       | 104   | yes             | yes               | yes              | yes                     |
| exp3             | 86                     | 6                        | 0                       | 92    | yes             | yes               | no               | no                      |
| exp4             | 46                     | 0                        | 0                       | 46    | yes             | yes               | yes              | no                      |
| exp5             | 64                     | 6                        | 0                       | 70    | yes             | yes               | yes              | no                      |
| exp6             | 55                     | 1                        | 0                       | 56    | yes             | yes               | no               | no                      |
| exp7             | 95                     | 7                        | 0                       | 102   | yes             | yes               | yes              | no                      |
| exp8             | 89                     | 8                        | 0                       | 97    | yes             | yes               | yes              | no                      |
| exp9             | 85                     | 7                        | 1                       | 93    | yes             | yes               | yes              | yes                     |
| exp10            | 93                     | 0                        | 0                       | 93    | yes             | no                | no               | no                      |
| exp11            | 47                     | 15                       | 0                       | 62    | yes             | yes               | yes              | no                      |
| Lin D born in T1 | ProNm astrocyte number | AMesoNm astrocyte number | MesoNm astrocyte number | total | ProNm targeting | AMesoNm targeting | MesoNm targeting | controlateral targeting |
| exp1             | 17                     | 1                        | 0                       | 18    | yes             | yes               | no               | no                      |
| exp2             | 46                     | 0                        | 0                       | 46    | yes             | yes               | no               | no                      |
| exp3             | 19                     | 1                        | 0                       | 20    | yes             | no                | no               | yes                     |
| exp4             | 44                     | 0                        | 0                       | 44    | yes             | no                | no               | no                      |
| exp5             | 16                     | 0                        | 0                       | 16    | yes             | no                | no               | no                      |
| exp6             | 18                     | 0                        | 0                       | 18    | yes             | no                | no               | no                      |
| exp7             | 12                     | 0                        | 0                       | 12    | yes             | no                | no               | no                      |
| exp8             | 13                     | 2                        | 0                       | 15    | yes             | yes               | yes              | no                      |
| exp9             | 34                     | 12                       | 0                       | 46    | yes             | yes               | yes              | yes                     |
| exp10            | 45                     | 1                        | 0                       | 46    | yes             | yes               | no               | no                      |
| exp11            | 31                     | 1                        | 0                       | 32    | yes             | no                | no               | no                      |
| exp12            | 51                     | 0                        | 0                       | 51    | yes             | yes               | no               | no                      |
| exp13            | 64                     | 0                        | 0                       | 64    | yes             | no                | no               | no                      |
| Lin Z born in T1 | ProNm astrocyte number | AMesoNm astrocyte number | MesoNm astrocyte number | total | ProNm targeting | AMesoNm targeting | MesoNm targeting | controlateral targeting |
| exp1             | 28                     | 1                        | 0                       | 29    | yes             | yes               | no               | yes                     |
| exp2             | 71                     | 0                        | 0                       | 71    | yes             | no                | no               | no                      |
| exp3             | 56                     | 8                        | 0                       | 64    | yes             | yes               | no               | no                      |
| exp4             | 61                     | 5                        | 0                       | 66    | yes             | yes               | no               | no                      |
